# Supplementary material for: Aberrations in circulating inflammatory cytokine levels in patients with Down syndrome: a meta-analysis
Source: PubMed Central journal article supplement (PMC5663613; doi:10.18632/oncotarget.21060), 2017-09-19
Supplement: oncotarget-08-84489-s001.pdf [file oncotarget-08-84489-s001.pdf]

# Aberrations in circulating inflammatory cytokine levels in patients with Down syndrome: a meta-analysis

## SUPPLEMENTARY MATERIALS

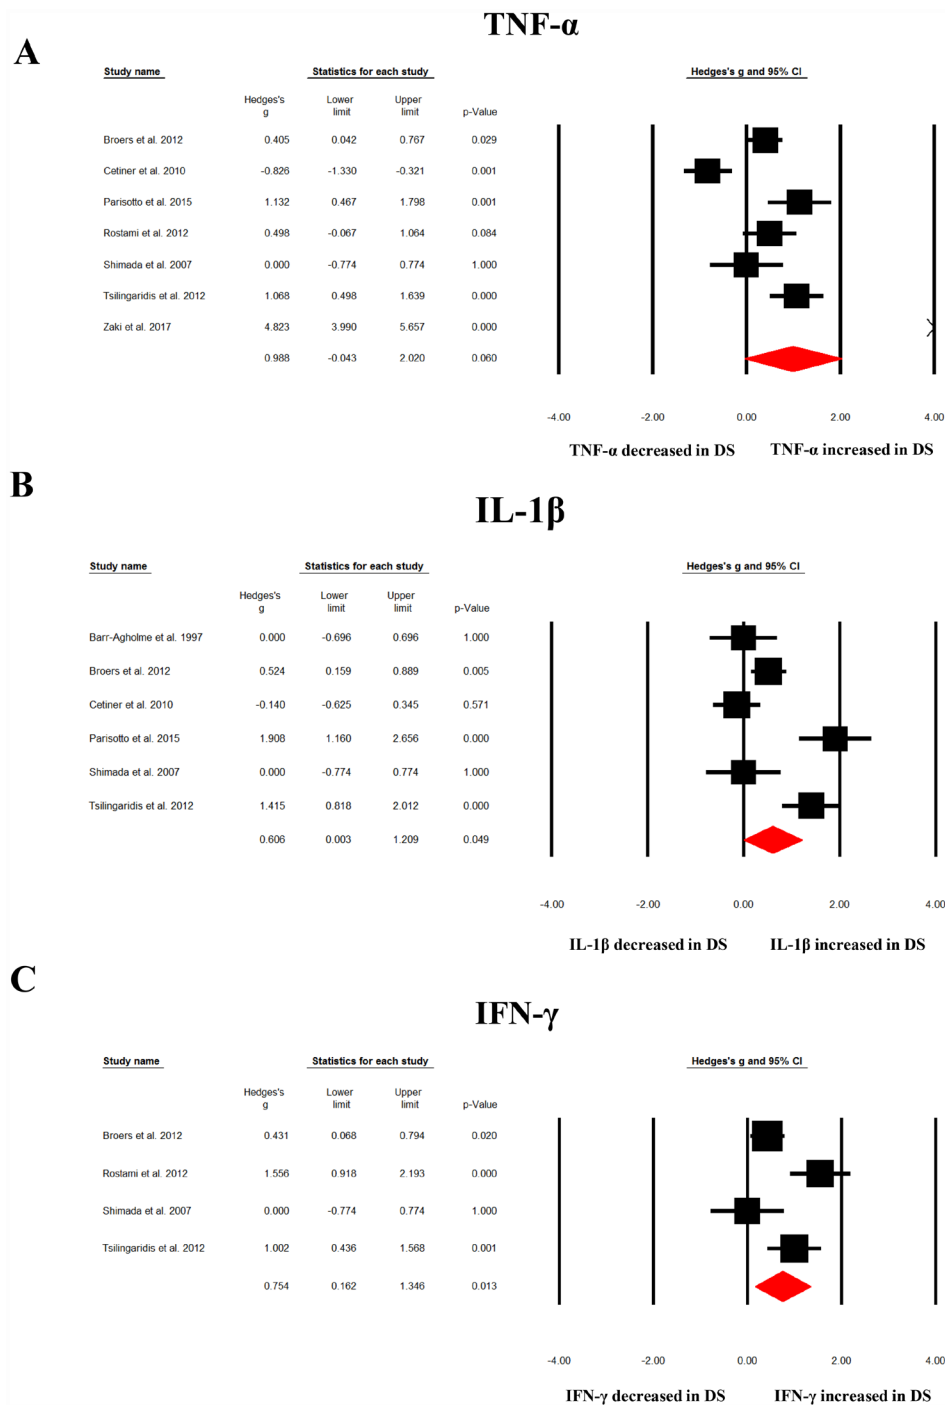

**Supplementary Figure 1:** Forest plot displaying random effects meta-analysis results of the association between TNF- $\alpha$  (A), IL-1 $\beta$  (B), IFN- $\gamma$  (C) and children with DS. The sizes of the squares are proportional to study weights.

**A**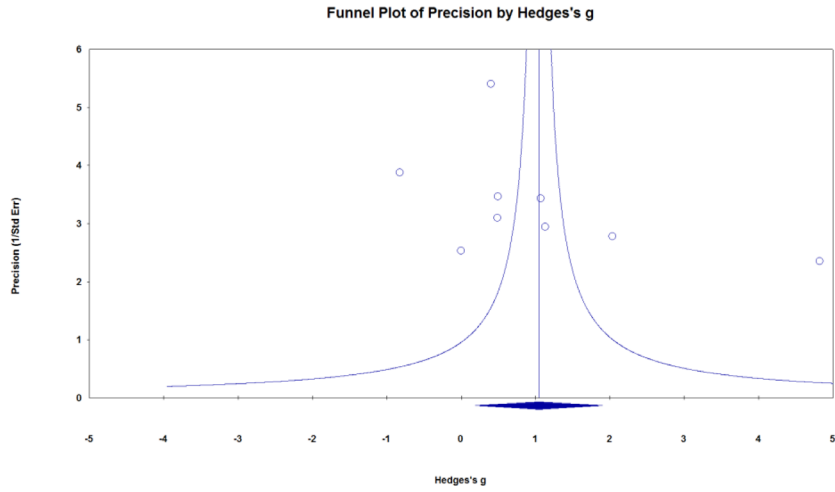**TNF- $\alpha$** **B**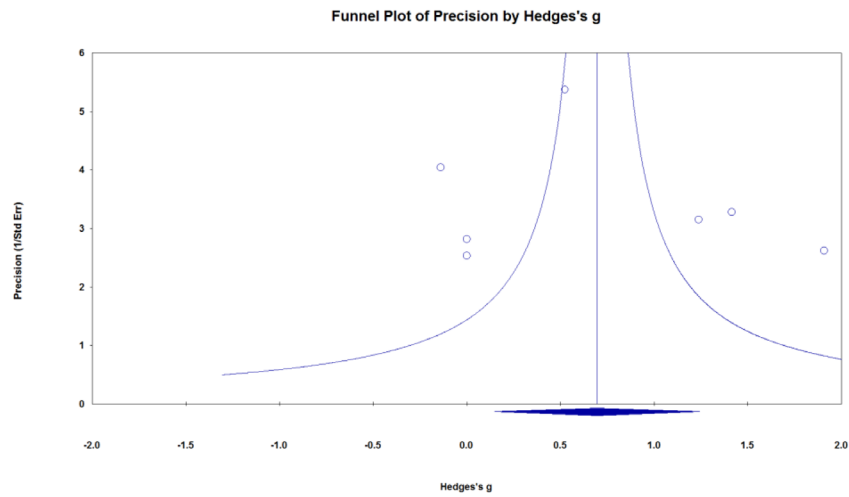**IL-1 $\beta$** **C**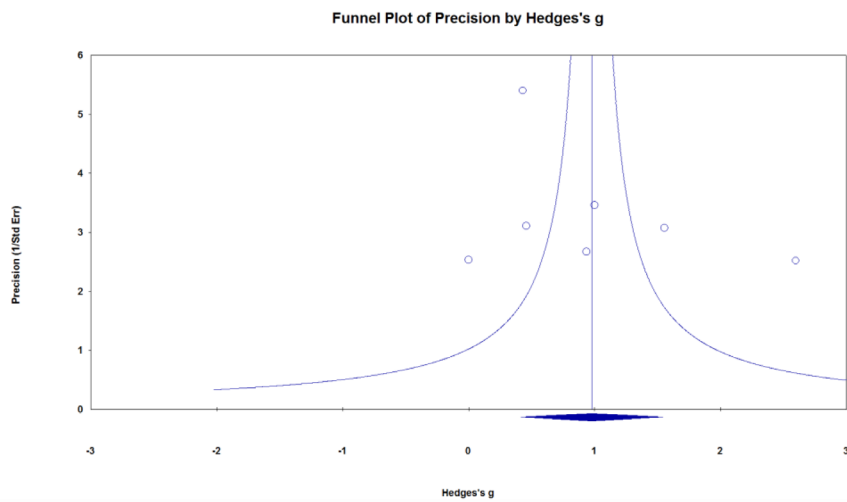**IFN- $\gamma$** 

**Supplementary Figure 2:** Funnel plots examining publication bias in studies comparing TNF- $\alpha$  (A), IL-1 $\beta$  (B), IFN- $\gamma$  and (C) levels between DS patients and controls.
